# Supplementary material
Source: Springer Nature journal article supplement (https://www.springermedizin.de/resource/supplementary/12874_2013_1023_MOESM6_ESM.pdf/9433092)

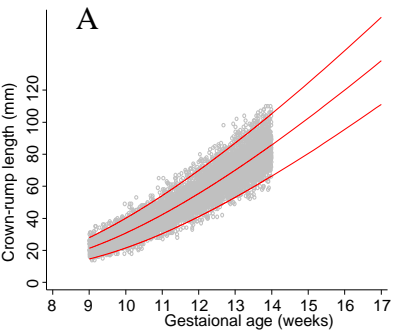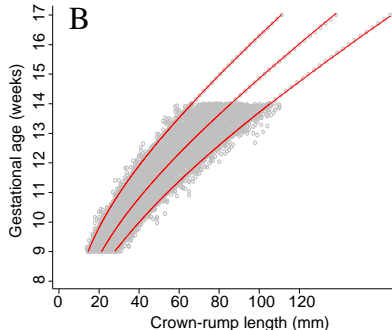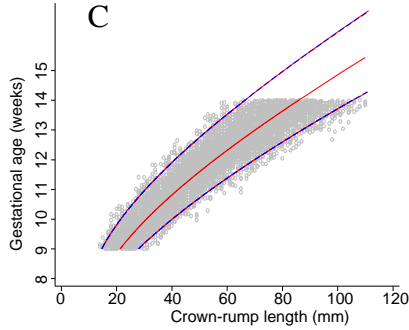

Supplement: MOESM6 [file 9433092]
